# Supplementary material for: Proteomic profiling of tumour tissue‐derived extracellular vesicles in colon cancer
Source: PubMed Central journal article supplement (PMC11080707; doi:10.1002/jex2.127), 2024-02-06

Supplementary Figure 1  
Western blot validation of select proteins from proteomics.

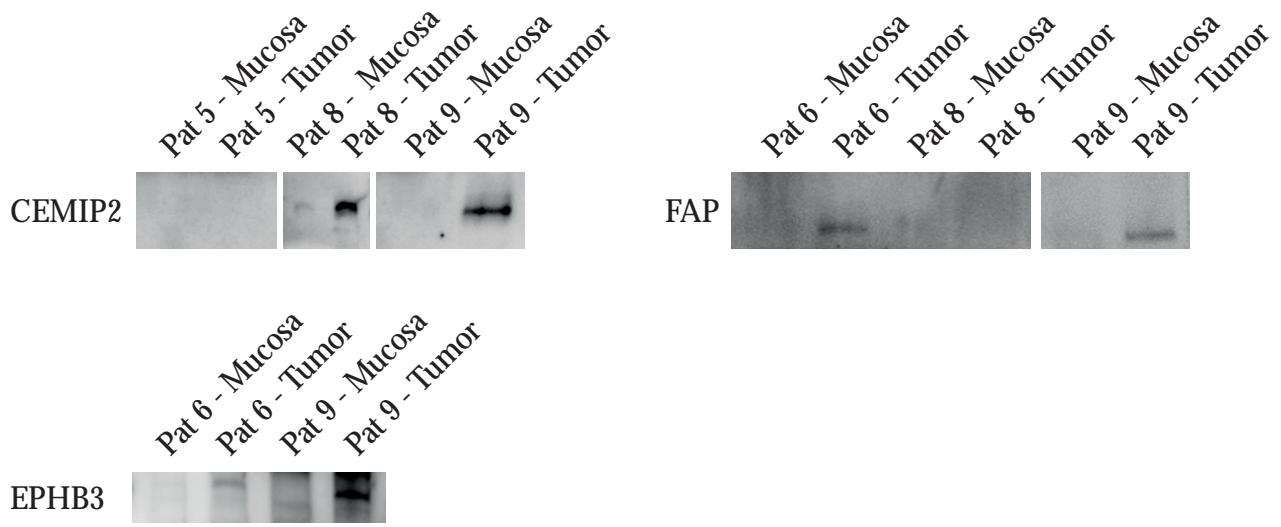

Supplement: JEX2-3-e127-s002.pdf [file JEX2-3-e127-s002.pdf]
